# Supplementary material
Source: publisher site journal article supplement (https://www.dovepress.com/article/323766)
Supplement: Supplementary file 1 [file get_supplementary_file.php]

| **Author** | **Type of design** | **Description** | **Outcome measures /Assessments** | **Adherence measure, ~dichotomous/^interval (definition)** | **Results** |
| --- | --- | --- | --- | --- | --- |
| Al Shammeri O, et al79 | Prospective cohort | 100 CVI patients: Compression V standard medical care | 10 CEAP and VCSS  20 Compliance and QoL (SF36) | ~Self-report questionnaire (Collected CS, used and noticed effect) | Adherence: 50%. Intervention superior to control VCSS (p=0.002), CEAP (p=0.003) Regression showed main association between adherence and improvement |
| Allaert F, et al68 | Prospective cohort | 79 females interviewed around adherence + Validation of the Adhesig tool | 10 Time in stockings and Thermosensor | ~(Self-report questionnaire + Thermosensor (score >3 on the Adhesig) | Adherence: 74% with < (or =) 3 attests to good adherence to CS, while values > suggest poor adherence with a sensitivity of 88.1% and specificity of 63.1% |
| Anderson I33 | Expert opinion (background info) | Improving community CS adherence | N/a | N/a | Venous disease needs to be managed through a multidimensional approach.  HCP praise and encouragement is invaluable. Can include highlighting improvements from effective compression using empathy and willingness to address challenges |
| Arpaia G,et al76 | Prospective cohort | 177 patients pre- and post-1 month Class 2 CS | 10vCVI symptoms (VAS), leg circumferences  20 Adherence | Not described | Adherence: 91.6%. Symptom improvements reached 68% and clinical improvements in 96% of patients. |
| Ayala A, et al69 | Prospective cohort | 889 patients prescribed CS pre- and post- 3 months on symptoms and adherence | 10 Compliance (interview)  20Nil | ^Self-report interview (Wearing CS as prescribed) | Adherence: 31.8%. Main causes of lack of compliance reflect cultural and weather conditions of the country |
| Bainbridge P31 | Expert opinion (background info) | Patient-HCP relationship on adherence | N/a | N/a | Adherence can be considered intentional or unintentional HCP: The modern approach is to put the patient at the center of the decision-making process with the HCP acting as an expert advisor |
| Balcombe L, et al54 | Critically appraised topic | 12 studies investigating donning/doffing devices on compliance | 10vUse of various applicators  20 Compliance | Not described | Material foot slip may improve adherence compared to a frame and education regarding use may help. Devices and enhanced education should be provided to all patients prescribed CS |
| Baranski K and Chudek J55 | Structured interview (Qualitative) | 407 structured interviews about CVI self-management | 10 Use of pharmacotherapy, CS and lifestyle changes  20 Nil | Self-report interview (not described) | Likely higher CS adherence if longer disease duration and no obesity. Patient perception of patients: CS was inconvenient and doubtful in improving QoL |
| Benigni J.P, et al50 | RCT | 102 Women: Progressive V conventional CS | 10 Ease donning/doffing + comfort  20 Nil | Self-report via questionnaire (not described) | Progressive CSs were associated with ease of putting on/taking off than conventional CS |
| Benigni J.P, et al80 | RCT - crossover | 125 females randomized to Class 1 or reference CS | 10 Venous clinical outcomes (VAS, leg circumferences)  20 Adherence and Qol (VAS) | ~Self-report journal (Wore >6 hours equal or > 80% of the time) | Adherence: 95%. Adherence to class 1 CSs showed improved CVI symptoms and QoL criteria |
| Bogachev V, et al82 | Prospective cohort | 7397 CVI patients in an outpatient clinic pre- and post- approximately 8months | 10 CEAP  20Adherence with medications and CS | ^Self-report questionnaire and interview (Wore CS as prescribed) | Adherence: 29.1%. Non-operative management (medications, lifestyle advice and CSs) improved CVI |
| Brooks J, et al60 | Quasi-experimental RCT | 49 patients randomized to control or education about elevation and CS pre- and post-12 months | 10 VLU recurrence  20Elevation adherence, time in CS and ankle mobility | ~Professional recorded (Wore stockings daily) | Adherence: No significant difference. Control:55% V Intervention: 66%. VLU recurrence: Control:36% and Intervention:4% (p=0.004) related to leg elevation, mobility, and ankle movement |
| Brown A34 | Expert opinion (background info) | Behavior change model using self-efficacy for VLU patients | N/a | N/a | High susceptibility, high severity, high benefits, and low barriers lead to a high probability of following HCP advice. Treatment should be VLU based on the patient's perspective of health care |
| Brown A35 | Expert opinion (background info) | Patient knowledge deficit around VLU etiology | N/a | N/a | Verbal education is better than through leaflets.  HCPs should adopt the role of a credible authority, providing clear, consistent, specific, early, and honest information |
| Cataldo J.L, et al16 | Prospective cohort | 3414 patients pre- and post-1 month with CS | 10 CEAP  20Adherence | ~Self-report questionnaire (Wore CS >6 hours daily) | Adherence: 59.4%. Improved symptoms were found when using CSs >6 hours daily and for more than 4 weeks |
| Christensen C.R and Yeager A.A65 | Case study | 1 VLU patient in a nursing home using bed alarms and a signed contract | 10 Number of hospitalizations and VLUs  20 CS and elevation adherence | Not described (assume nursing report) | Adherence with elevation and compression reduced VLU |
| Clarke-Moloney M, et al 51 | Pilot RCT | 100 patients randomized to Class 1 V Class 2 | 10 VLU recurrence  20Adherence | ^Self-report questionnaire (Wore CS all day every day - removing at night) | Adherence: 88.9%. Non-adherence increased risk of VLU recurrence. The higher the level of compression, the less likely a VLU recurrence.  No donning or doffing difference between class 1 or class 2 |
| Dahm K.T, et al84 | Systematic review | 5 RCTs evaluating Class 2 V Class 3 for CVI | 10: Thrombosis, VLUs and mobility  20 Pain and adherence | Compliance discussed as a secondary outcome post hoc | Adherence rates likely decrease with higher compression. Class 2 seems to be more effective in prevention of ulcer recurrence than class 1 (p<0.0001) |
| Dickey J.W66 | Case series | 4 case studies comparing VLU healing to compliance with CS and education | 10 VLU healing  20 Adherence | ~Assume nursing report (Not specified) | The clinical course of each patient shows that faster healing was causally related to patients' compliance |
| Dissemond J, et al36 | Consensus paper (background info) | How to manage VLU with CS | N/a | N/a | Patient-centered care requires HCP team cooperation, considering needs of patients and their families in a non-judgmental way improving acceptance and adherence |
| Erickson C.A, et al81 | Retrospective cohort | 71 patients received CS and elevation education: Unna’s boot V Class 3 CS | 10 Time to VLU healing recurrence  20 Adherence | **~** Professional recorded (Kept 100% of their appts, adhered completely with CS and instructions for wound and leg care) | Adherence: 32.3%. Healing in 73% (adherent) V 59% (nonadherent). Similar effect on time to recurrence |
| Finlayson K, et al12 | Retrospective cohort | 122 patients with VLU survey and medical record review | 10 VLU and psychosocial variables  20Adherence | ~Self-report survey (Wore their CS daily) | Adherence: 47%. There is a strong link between wearing CS and patient knowledge, higher self-efficacy, and lower depression |
| Franks P.J, et al52 | RCT | 166 patients: Brand 1 V Brand 2 on ability to don/doff | 10VLU recurrence (observation)  20 Adherence (self-report) | ^Self-report questionnaire (Wore CS all day every day) | Adherence: Brand 1:84% V Brand 2:81%. Risk factors for recurrence were previous VLU size, history of DVT and unsuitability for stockings (not adherence). 15% could not put CSs on at all, and 26% only with great difficulty |
| Ham S and Padmore J46 | Case series | 3 case stories trialing different CS brands + nurse training | 10Ease of clinician application  20Adherence (comment only) | ~Assume nursing report (Not specified) | “The hosiery kit may be easier to apply that traditional CS, improving adherence” (*Product focus) |
| Hampton S47 | Case series | 10 clinicians and 1 patient testing an adjustable compression wrap + carer training | 10Ease of donning  20 Adherence (comment only) | ~Assume nursing report (Not specified) | Nursing report as 'very easy', or 'easy'. “This garment may solve the dilemma of applying compression in some patients” |
| Hanley T.P, et al77 | Prospective cohort | 284 patients adherent V non-adherent at baseline and 12 months | 10Clinical symptoms including VLU *Adherence (self-report) was the variable | ~Professional recorded and self-report phone (Wore CS regularly (4-7 days/week) | Adherence: 37%. 75% of adherent patients did not develop adverse clinical sequelae V 53% in the non-adherent group. |
| Harker J21 | Expert opinion (background info) | Influences on CS adherence | N/a | N/a | HCPs need to promote patient empowerment via a less authoritarian approach |
| Heal D67 | Case series | 4 case studies with SoftFit top | 10 Concordance and comfort  20Nil | ~Assume self-report (Not specified) | All 4 case studies indicate that wear time and adherence is improved by the addition of this technology (*product focus) |
| Heinen M, et al61 | RCT | 184 patients randomized to usual care V lifestyle counselling | 10Adherence with CS, physical activity and wound care  20 VLU | **^**Self-report interview (Wore CS when out of bed - always) | Adherence: 45%. Similar increase to adherence with CS in both groups. Intervention: Fewer wound days (p<0.01), but time till recurrence did not differ significantly (p=0.07) |
| Heinen, M. M, et al83 | Development of a program (background info) | 141 in phase 2 and 25 in phase 4: Needs assessment + review | N/a | ~Assume self-report (Wore CS when out of bed) | Coaching and lifestyle programs for VLU patients towards adherence with CS and healthy lifestyle is recommended |
| Heinen, M. M, et al70 | Prospective cohort | 150 patients interviewed and wore CS and accelerometer over 7 days | 10 Level of physical activity and CS adherence  20 VLU | **^**Self-report interview (Wore CS when out of bed) | Adherence: 39%. Low levels of physical activity were established in patients with VLU |
| Jindal R, et al92 | Retrospective cohort | Epidemiological study of 922 Indian patients comparing circumferential measures to manufacturer’s sizing tables | 10 Fit into standard sizing charts  20Nil | N/a | Discrepancy between measures and sizing charts is common in India affecting compliance. If sizing fits a chart likely problem is related to application/removal |
| Jones J37 | Expert opinion (background information) | Improving compliance with VLU treatment | N/a | N/a | A collaborative approach between patient and HCP will aid adherence |
| Jull A. B, et al38 | Structured interview (qualitative) | 129 healed VLU patients structured phone interviews about CS | 10 Concordance  20Nil | ^Self-report interview (Wore CS every day) | Adherence: 52%. Influenced by belief in CS worth, and comfort. HCPs should increase perceived value of CSs and provide information about risks before benefits. |
| Kankam H.K.N, et al17 | Critically appraised topic | 58 studies about compliance with CS for CVI and post-thrombotic syndrome | N/a | (Wearing CS for >50% of the time) | Overall, 62% had good compliance, greater for CS <25mmHg (77%) V >25mmHg(65%) |
| Kapp S, et al58 | RCT | 100 patients randomized to moderate V high CS | 10 VLU recurrence  20 Adherence | ~Not described (>50% study days) | Adherence: 44.1%. Nonadherence significantly higher in the high compression group (p=0.003). Adherence predicted study wound recurrence (p=0.005) with 3 x recurrence risk for moderate V high compression |
| Kolluri R93 | Background information | Compression for CVI | N/a | N/a | Improve compliance with CS by tailoring to the needs of the individual patient with adequate education |
| Krijnen R.M.A, et al62 | Quasi RCT | 114 male workers: Class 2 CS V rubber mats V controls | 10 Venous clinical symptoms  20Adherence | ~Self-report interview (Wore CS almost every day at work) | Adherence: 66.6%. Reduced complaints and leg swelling using CSs |
| Lay-Flurrie K39 | Background information | Use of CS was explored | N/a | N/a | The plethora of garments available may be daunting. Specialist support and guidelines helps to inform decision-making |
| Lindsay E7 | Prospective cohort | Review of 93 patient records pre- and post-Leg Club | 10 Patient attendance, cost, VLU  20Adherence | Nor described | Adherence improved 83-95%. Most incurred costs of <UK50 pounds for wound products and CSs over 1 year, however a few incurred costs of >UK200 pounds |
| Lindsay E and Hawkins J30 | Case study | 1 patient in a Leg Club with collaboration and compression styles | 10 VLU  20 Compliance | Not described | HCP: Use available resources, allocate tasks. Partnerships work best with overt, not covert power differences |
| Lurie F and Schwartz M63 | RCT | 89 patients randomized to pump or CS | 10 Compliance  20 VCSS and leg circumferences | ~Self-report diary, device mater (Wore CS during wakeful hours for 30 days for at least 10 hours) | Adherence: No significant difference. CS:85%, pump:87%. Self-reported time of use tends to overestimate the actual use |
| Manduz S,et al71 | Qualitative interview | 1004 patients as face-to-face questionnaire | 10 Adherence  20 CEAP | **^**Self-report survey and professional recorded (CSs recommended, bought, and still use) | Adherence: Results unclear. 54.7% thought CS were part of treatment. In Muslim society, ablution is a prerequisite for prayer/worship (to wipe both feet up to the heel 3 times, 5x daily), a barrier to adherence |
| Mayberry J.C, et al78 | Prospective cohort | 113 patient records reviewed pre- and post-non-operative management | 10 VLU recurrence  20 Compliance | ~Professional recorded (Wore all day and removed at night) | Adherence: 79%. Only non-compliance with CS (p<0.0001) and a pre-treatment VLU duration > 9 months (p<-0.02) decreased VLU healing. All noncompliant had recurrent VLU by 36months |
| Milic D.J, et al45 | RCT | 361 patients randomized Class 3 V Class 2 for a 5-year study | 10 VLU  20 Compliance | ~Professional recorded (wore CS 80% of the time during the 1st and 2nd years, and >50% of the time during 3rd, 4th and 5th years) | Adherence: Class 3:89.7% V Class 2:93.75%. Rates of noncompliance after 5 years were 10.23% for the compression class 3 group and 6.25% for the compression class 2 group (Not statistically significant P = 0.188). Class 3 had lower VLU recurrence (P<0.001) compared to Class 2 |
| Milic D.J, et al64 | RCT | 131 patients randomized to Class 3 V 2 types of bandages | 10 VLU  20 Compliance | Not described | Adherence: No overall rate provided. The healing rate with VLU area of 5-10cm2 in group A (Class 3 CS) was 25%, in group B (bandage type 1) was 64% and for group C (bandage type 2) was 75%. Compliance for group A was ‘good’ and for group B and C was ‘poor’ |
| Moffat C, et al85 | Critically appraised topic | 10 studies appraised on VLU, compression and concordance | N/a | All except one used self-report (Not described) | 6 studies indicate that the healing rate was half when non-concordant. Recurrence rates were 2-20 times greater if not concordant post healing |
| Moffat C.J6 | Background information | Expert opinion on concordance with CA and VLU outcomes | N/a | N/a | Pain and symptom control are vital.  Improving concordance requires a sensitive, therapeutic HCP relationship. Avoid judgmental attitudes and blaming the patient |
| Motykie G.D, et al75 | Prospective cohort | 112 patients pre- and post CS over 16 months | 10 CEAP  20Compliance | Not described | Adherence: 82%. Improvement (P<.0.001) in patient severity scores for swelling, pain, skin discoloration, activity tolerance, depression and sleeping problems. CS improved QoL |
| Mudge E, et al40 | Qualitative interview | 6 patients semi-structured focus-group about treatment and adherence | 10 Patient understanding. 20Nil | Not described | Lower adherence with power imbalance, or lack of trust in HCP |
| Mullins M, et al48 | Case series | 5 case studies using Extremit-Ease CSs | 10 Venous clinical symptoms  20compliance | Not described | The Extremit-Ease was easier to use so showed higher compliance *Product focus |
| Murdoch V32 | Case study | 1 case study attempting to improve concordance with collaboration and CS styles | N/a | N/a | Use of a Prescribing Pyramid and HCP mutual respect helps to improve concordance. In a local Healthy Leg Clinic, prevention (UK100pounds/year/person) of VLU is more cost effective than treatment (UK1500pounds) |
| Nelson E.A, et al57 | RCT | 300 patients randomized to Class 2 V Class 3 | 10 Venous clinical symptoms (leg circumference and VLU  20 Compliance | ~Self-report and professional recorded (Wore CS during the study) | Adherence: Class 3:58% V Class 2:72%. Difference in VLU recurrence is not statistically significant. Effectiveness of class 3 is diluted by poorer compliance. Nonadherence 42% in class 3 and 28% in class 2 (no statistical analysis presented) |
| Protz K, et al43 | Quasi-RCT | 136 VLU patients: Control V educational pamphlet | 10 Patient knowledge  20 Nil | Not described | Adherence: No overall rate provided. Invention group were better informed about their disease and the related CS, reporting that it improved adherence, though no significance data reported |
| Raju S, et al72 | Retrospective cohort | 3144 patients’ medical records reviewed | 10 Compliance  20 CEAP | ^Professional recorded (Daily wear of CS) | Adherence:21%. Compliance was similar across symptoms (pain (39%), swelling (37%), dermatitis (46%), VLU (37%). It improved with longer symptom duration |
| Rees T49 | Case study | 1 case study using change from Class 2 to 1, and carer training/applicator | 10 Compliance  20 VLU | Not described | The patient was able to tolerate class 1 and her carer could apply them resulting in a better outcome |
| Samson, R.H and Showalter D.P9 | Prospective cohort | 53 CVI and VLU private patients pre- and post-intervention | 10 Compliance  20 Venous clinical symptoms and cost | ^Measurement not described (CS were worn daily and new stockings bought as necessary) | Adherence: 47%. Only 1 in adherent group developed a recurrence. 22/28 non-adherent had recurrence. Cost was a major reason for noncompliance. Healing primary ulcers cost US$85-1474 (average $507). VLU healing cost $60-2200 (average $1270) |
| Shannon M.M, et al73 | Prospective cohort | 71 patients answered questionnaires on VLU management | 10 Compliance with CS, leg elevation  20 Nil | ~Self-report questionnaire: Wearing CS every day | Adherence: 73%. Significant weight gain was reported by 25%. Prevention of weight gain should be examined as a possible intervention to prevent VLU recurrence |
| Stansal A, et al44 | Prospective cohort | 100 patients via interview/standardized form | 10 Adherence  20 CS use and patient knowledge | ~Professional recorded (Wore CS to the appointment, correctly applied, and effective) | Adherence: 89%. The most common reason for nonadherence (45%) in this study was poor understanding of the benefits of CS. If seen by Vascular Specialists:93% V GPs:67% (p<0.01) |
| Suehiro K, et al56 | Retrospective cohort | 120 patients offered 4 different sizes of CS | 10 Clinical venous symptoms and leg circumferences  20 Adherence | ~Measurement not described (Wore CS >5 days/week) | Adherence: 80%. Best adherence with Class 1 stocking as better tolerated and easier to apply, while the best efficacy was achieved by using bandages |
| Todd M5 | Background information | Informal literature review regarding recommendations for CS | N/a | N/a | CVI is costly on resources, HCP workload, and disease impact. Physical and psychosocial impact is expensive and can reduce concordance |
| Uhl J, et al94 | Background information | 10 healthy students wearing CS fitted with Thermotracker to compare to self-report | 10 Accuracy comparing self-report) to Thermotrack device | Self-report (diary) and Thermotracker (Wore CS daily for 1 week) | The Thermotrack device was accurate in tracking patient’s compliance with applying CSs |
| Uhl J, et al42 | RCT | 40 patients randomized to minimal recommendations V in depth + SMS messages | 10 Adherence  20  CIVIQ QoL | Self-report (diary) and Thermotracker (Average number of days worn per week) | Adherence: Control 48% V Intervention 71%. Increase in time the CS is used by 33% (P<0.001). Days worn is a good criterion of compliance (do not need hours/day). Correlation (both P<0.001) between wearing time and 2 parameters of the CIVIQ: psychic and social |
| Van Hecke A, et al 41 | Prospective cohort | 26 patients received lifestyle advice and goal setting by trained nurses | 10Adherence (CS, elevation, and exercise)  20  VLU and QoL | ~Self-report diary (Wore CS as described) | The education improved adherence to VLU advice but not time in CS. Several reported an increase in QoL |
| Van Hecke A, et al11 | Systematic review | 20 studies were included on VLU and compliance with CS, lifestyle advice and leg exercises | Literature review | Self-reporting most common way (The extent to which the compression system is worn and /or the extent the treatment regimen was followed) | No study has been able to offer an acceptable and well-documented solution to the non-compliance problem. There is lack of consistency in defining non-compliance |
| Van Hecke A, et al18 | Systematic review | 31 studies included if reported on reasons for nonadherence | Literature review | N/a | Non-adherence is a multi-dimensional problem. A multifaceted approach and a holistic assessment are needed.  Therapeutic, non-judgmental HCP relationships are essential to enhance adherence |
| Weller A1 | Systematic review | 2 RCTs on interventions to improve CS adherence in VLU | Literature review | N/a | There is a lack of trials of interventions that promote adherence to compression therapy for VLUs. Low quality evidence from 2 trials was identified but neither revealed a benefit |
| Ziaja D, et al74 | Prospective cohort | 16770 patients surveyed on demographic and venous data and outcome from CS and drug therapy | 10Compliance  20 Nil | ~Self-report survey ( wore stockings daily) | Adherence: Women 27%: Men 20.3%. CS use increased with symptom severity |
| Zajkowski P.J, et al53 | RCT | 11 patients randomized through a sequence of 4 brands of Class 3 CSs | 10 CS use, exercise and leg elevation and brand satisfaction  20 Nil | Self-report diary (definition not provided) | There was no association between brands and adherence |

Notes: ~ Dichotomous scale. ^Interval scale converted to dichotomous scale by study authors. 10 Primary outcome measure. 20 Secondary outcome measure.

Abbreviations: CEAP, clinical-etiological-anatomical-pathophysiological; CS, compression stockings; CVI, chronic venous insufficiency; GP, general practitioner; HCP, health care professional; N/a, not applicable; QoL, quality of life; RCT, randomized controlled trial; SMS, short messaging service; V, versus; VCSS, venous clinical severity score; VLU, venous leg ulcer
